# Supplementary material
Source: PubMed Central journal article supplement (PMC5394862)
Supplement: 3d3add2cd60da2d7c353920d5aeca68d_2016_149476-Disclosures_and_Contributions.pdf [file 3d3add2cd60da2d7c353920d5aeca68d_2016_149476-Disclosures_and_Contributions.pdf]

Haematologica  
HAEMATOL/2016/149476  
Version 3

Genetic features of myelodysplastic syndrome and aplastic anemia in  
pediatric and young adult patients

Sioban B. Keel, Angela Scott, Marilyn Sanchez-Bonilla, Phoenix A. Ho,  
Suleyman Gulsuner, Colin C. Pritchard, Janis L. Abkowitz, Mary-Claire  
King, Tom Walsh, and Akiko Shimamura

Disclosures: Akiko Shimamura: This work was supported by NIH/NIDDK grant R24DK099808 , the Aplastic Anemia & Myelodysplastic Syndrome International Foundation, the Ghiglione Aplastic Anemia Fund, and the Julian's Dinosaur Guild at Seattle Children's Hospital. Phoenix Ho: No disclosures related to the content of this work, P. H. is a current employee of, and owns stock and stock options in, Seattle Genetics, No patents or copyrights related to this work. All other authors have no other conflicts of interest to be disclosed.

Contributions: SK performed research and data analysis and wrote the manuscript. AScott performed research and data analysis and wrote the manuscript. MSB performed research and data analysis PAH performed research and data analysis. SG performed research and data analysis. TW performed research and data analysis and supervised the study. CCP performed data analysis. JLA supervised the study. MCK performed data analysis and supervised the study. AS performed data analysis , wrote the manuscript, and supervised the study.
