# Supplementary material
Source: PubMed Central journal article supplement (PMC5394862)
Supplement: ef6aa912b04117b56b9dae8f3940049f_HAEMATOL-2016-149476v3-Keel-01.pdf [file ef6aa912b04117b56b9dae8f3940049f_HAEMATOL-2016-149476v3-Keel-01.pdf]

# Screening for specific bone marrow failure/myelodysplastic syndrome genetic disorder in aggregate identifies a significant subset of patients with inherited bone marrow failure/myelodysplastic syndrome

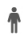

Children and young adults with aplastic anemia or myelodysplastic syndrome

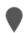

Patients transplanted in the Fred Hutchinson Cancer Research Center (1990-2012)

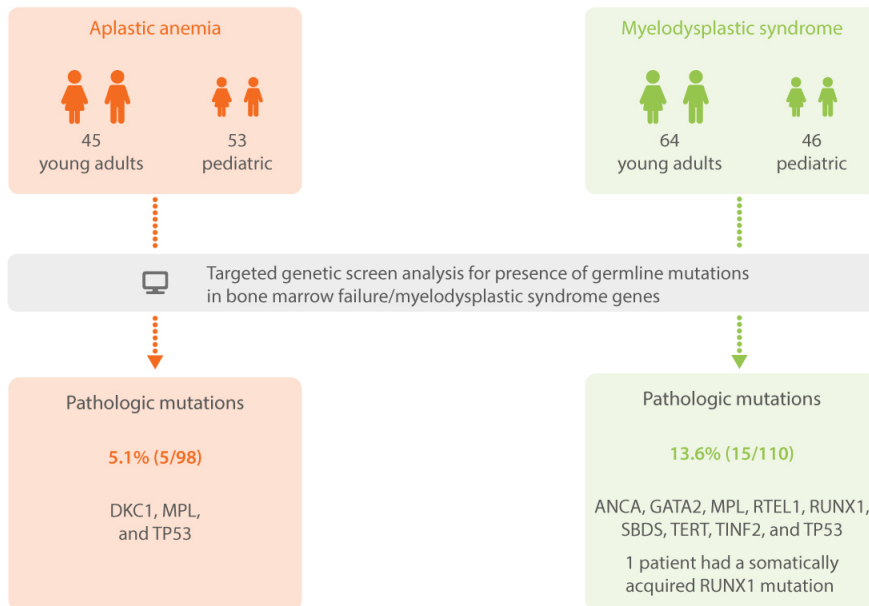

Family history or physical examination failed to reliably predict the presence of germline mutations
